# Supplementary material for: Spermidine Suppresses Development of Experimental Abdominal Aortic Aneurysms
Source: PubMed Central journal article supplement — J Am Heart Assoc. 2020 Apr 19;9(8):e014757. doi: 10.1161/JAHA.119.014757 (PMC7428527; doi:10.1161/jaha.119.014757), 2020-04-19
Supplement: JAH3-9-e014757-s001.pdf [file JAH3-9-e014757-s001.pdf]

# **SUPPLEMENTAL MATERIAL**

**Table S1. Major Resources.****Animals (in vivo studies)**

| Species | Vendor or Source                | Background Strain | Sex  |
|---------|---------------------------------|-------------------|------|
| Mice    | Xiangya School of Medicine, CSU | C57BL/6           | Male |

**Antibodies**

| Target antigen                            | Vendor or Source | Catalog #  | Working concentration       |
|-------------------------------------------|------------------|------------|-----------------------------|
| CD3                                       | Abcam            | ab16669    | IHC 1:400                   |
| CD31                                      | Abcam            | ab28364    | IHC 1:100                   |
| CD68                                      | Abcam            | ab125212   | IHC 1:400                   |
| SMC $\alpha$ actin                        | Abcam            | ab5694     | IHC 1:800<br>IF 1:400       |
| Myeloperoxidase                           | Abcam            | ab208670   | IHC 1:500                   |
| SQSTM1/p62                                | Abcam            | ab91526    | IHC 1:200<br>IF 1:100       |
| SQSTM1/p62                                | Abcam            | ab109012   | WB 1:10000                  |
| LC3B                                      | CST              | 3868T      | WB 1:1000                   |
| Beclin1                                   | proteintech      | 11306-1-AP | WB 1:1000                   |
| GAPDH                                     | Abcam            | ab181602   | WB 1:10000                  |
| mTOR                                      | CST              | 2983S      | WB 1:4000                   |
| p-mTOR                                    | Santa Cruz       | sc-293133  | WB 1:2000                   |
| Keap1                                     | Abcam            | ab227828   | WB 1:1000                   |
| FITC anti-mouse CD45                      | Biolegend        | 103107     | 0.2ug/10 <sup>6</sup> cells |
| PE/Cy7 anti-mouse CD11b                   | Biolegend        | 101216     | 0.2ug/10 <sup>6</sup> cells |
| APC anti-mouse Ly-6G                      | Biolegend        | 127614     | 0.2ug/10 <sup>6</sup> cells |
| PE anti-mouse Ly-6C                       | Biolegend        | 128007     | 0.2ug/10 <sup>6</sup> cells |
| PE/Cy7 anti-mouse CD11b                   | Biolegend        | 101216     | 0.2ug/10 <sup>6</sup> cells |
| Violet 421 <sup>TM</sup> anti-mouse F4/80 | Biolegend        | 123137     | 0.2ug/10 <sup>6</sup> cells |

**Figure S1. Quantification of elastin and SMA in experimental AAA.**

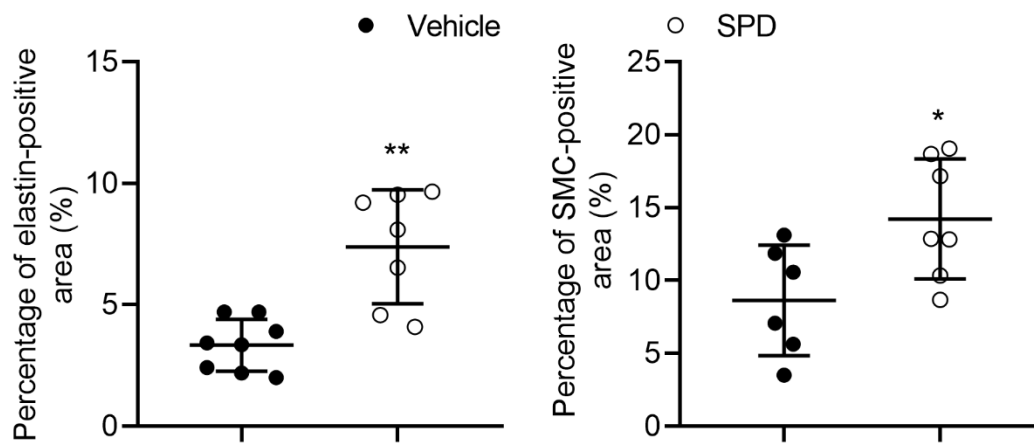

The percentage of elastin ( $P < 0.001$ ) and SMC ( $P = 0.028$ ) positive area in the total medial area was quantified with ImageJ software in each group. Data are presented as mean  $\pm$  SD. unpaired  $t$  test,  $*P < 0.05$  and  $**P < 0.01$  vs. vehicle group,  $n = 4-7$  in each group.

**Figure S2. Masson and IHC staining in human AAA and aorta.**

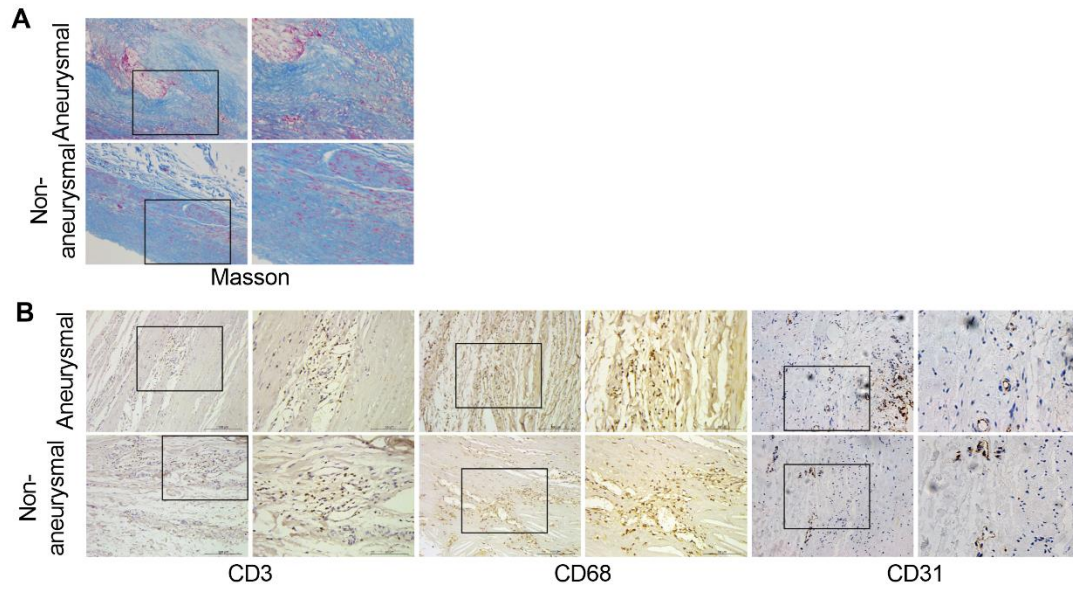

Human abdominal aneurysm and adjacent non-aneurysm aortic segments were conducted Masson and IHC staining. Representative images for muscle fiber (red), CD3<sup>+</sup> T cells, CD68<sup>+</sup> macrophages and CD31<sup>+</sup> blood vessels in each group were shown above.

**Figure S3. Spermidine treatment reduces aortic remodeling in established experimental AAA.**

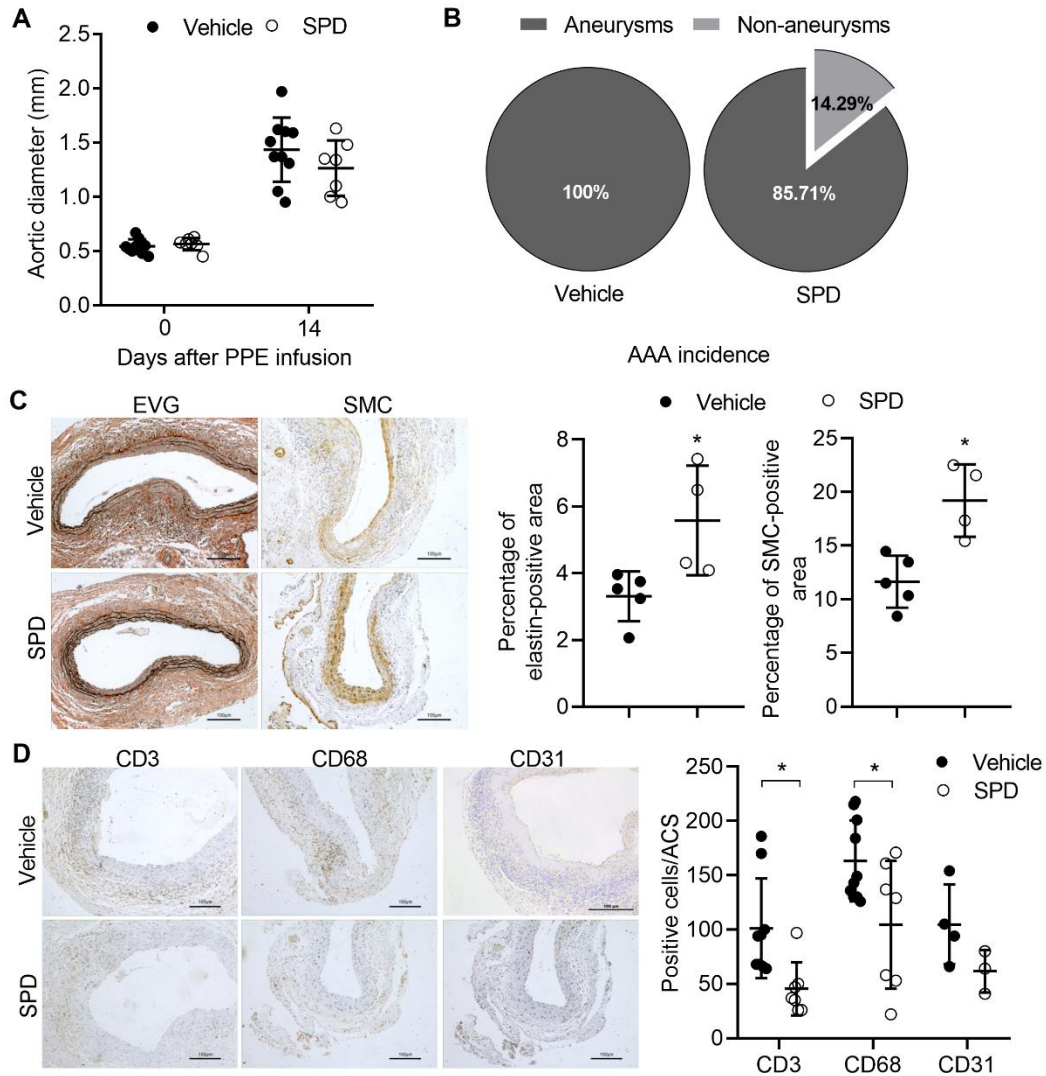

Vehicle and SPD treatment was performed in established experimental AAA from 3 days after PPE infusion to execution. (A) Aortic diameter (mm) of mice treated with vehicle (n= 10) or SPD (n=7) at day 0 and day 14. Data are presented as mean  $\pm$  SD. Unpaired *t* test,  $P = 0.237$  vs. vehicle group. (B) AAAs developed in 10 mice (100%, 10/10) within 14 days in the vehicle group, whereas AAAs developed in 6 mice (85.71%, 6/7) within 14 days in the SPD group. Fisher's exact test,  $P= 0.41$  vs. vehicle

group. (C) Representative images and positive area for elastin ( $P= 0.004$ ) and SMC ( $P= 0.017$ ) in each group. (D) Representative images for  $CD3^+$  T cells ( $P= 0.012$ ),  $CD68^+$  macrophages ( $P= 0.023$ ) and  $CD31^+$  blood vessels ( $P= 0.128$ ) and quantified as the positive stain cells per ACS and SMC in each group. Scale bar =100  $\mu\text{m}$ . Data are presented as mean  $\pm$  SD. Unpaired  $t$  test, \*\*  $P < 0.01$  and \* $P < 0.05$  vs. vehicle group,  $n= 3-8$  in each group.
